# Supplementary material for: Species and Strain Variability among Sarcina Isolates from Diverse Mammalian Hosts
Source: MDPI journal article supplement (doi:10.3390/ani13091529), 2023-05-03
Supplement: s1 [file s1]

**Table S1.** Positions of six genes within the genomes of nine bacterial strains used for primer pair construction. The NCBI database (<https://www.ncbi.nlm.nih.gov/nucleotide/>) has been used for these purposes.

| Strains                                           | <i>ileS</i> (position)            | <i>pheT</i> (position)             | <i>pyrG</i> (position)            | <i>rplB</i> (position)             | <i>rplC</i> (position)             | <i>rpsC</i> (position)             |
|---------------------------------------------------|-----------------------------------|------------------------------------|-----------------------------------|------------------------------------|------------------------------------|------------------------------------|
| <i>Clostridium carnis</i> NCTC 10913 <sup>T</sup> | UYIN01000001<br>(1153251-1156364) | NZUYIN01000006<br>(c73540-71162)   | UYIN01000001<br>(1274954-1276567) | NZUYIN01000020<br>(183618-184448)  | NZUYIN01000020<br>(181987-182616)  | NZUYIN01000020<br>(185167-185832)  |
| <i>C. celatum</i> DSM 1785 <sup>T</sup>           | AMEZ01000002<br>(28127-31237)     | NZKB291681 (20477-<br>22855)       | AMEZ01000033 (29267-<br>30865)    | NZKB291623 (2861-3694)             | NZKB291623 (1232-1861)             | NZKB291623 (4422-5090)             |
| <i>C. disporicum</i><br>2789STDY5834855           | CYZV01000005<br>(c59684-56574)    | CYZV01000034 (c13255-<br>10877)    | CYZV01000044<br>(c27140-25536)    | CYZV01000028 (c29517-<br>28684)    | CYZV01000028 (c31146-<br>30517)    | CYZV01000028 (c27957-<br>27289)    |
| <i>C. sartagoforme</i> AAU1                       | ASRV01000091<br>(c38061-34951)    | ASRV01000086 (7001-<br>9379)       | ASRV01000213 (c4957-<br>3356)     | ASRV01000021 (c18384-<br>17551)    | ASRV01000021 (c20013-<br>19384)    | ASRV01000021 (c16821-<br>16153)    |
| <i>C. septicum</i> P1044                          | NZFLTT01000006<br>(5620-8730)     | NZFLTT01000049 (c4309-<br>1931)    | NZFLTT01000017<br>(40563-42170)   | NZFLTT01000042 (2633-<br>3466)     | NZFLTT01000042 (1000-<br>1629)     | NZFLTT01000042 (4196-<br>4864)     |
| <i>C. tertium</i> src5                            | NZOAOE01000010<br>(30231-33341)   | NZOAOE01000002<br>(184806-187184)  | NZOAOE01000024<br>(42450-44051)   | NZOAOE01000018<br>(2787-3620)      | NZOAOE01000018 (1158-<br>1787)     | NZOAOE01000018<br>(4350-5018)      |
| <i>Sarcina ventriculi</i> NCTC 12966 <sup>T</sup> | UAUL01000007<br>(c267254-264144)  | NZUAUL01000008<br>(37282-39660)    | UAUL01000009 (19794-<br>21398)    | NZUAUL01000007<br>(c141122-140289) | NZUAUL01000007<br>(c142746-142117) | NZUAUL01000007<br>(c139552-138887) |
| <i>S. ventriculi</i> 14                           | NZBCMV01000019<br>(c60031-56921)  | NZBCMV01000024<br>(10607-12985)    | NZBCMV01000005<br>(c11072-9468)   | NZBCMV01000016<br>(2473-3306)      | NZBCMV01000016 (849-<br>1478)      | NZBCMV01000016<br>(4043-4708)      |
| <i>S. ventriculi</i> 17                           | NZBCMW01000010<br>(c60041-56931)  | NZBCMW01000003<br>(c374642-372264) | NZBCMW01000007<br>(17112-18716)   | NZBCMW01000017<br>(2483-3316)      | NZBCMW01000017 (859-<br>1488)      | NZBCMW01000017<br>(4053-4718)      |

Footnotes: NCTC - National Collection of Type Cultures, UK; DSM - German Collection of Microorganisms and Cell Cultures, c - complementary DNA sequence
