# Supplementary material for: Species and Strain Variability among Sarcina Isolates from Diverse Mammalian Hosts
Source: MDPI journal article supplement (doi:10.3390/ani13091529), 2023-05-03
Supplement: s1 [file s1]

**Table S3.** The NCBI accession numbers of genes used for phylogenetic reconstructions and the calculation of pairwise identity (in the study used *Sarcina* spp. isolates and their obtained NCBI accession numbers are marked in bold).

| Strains                                             | <i>ileS</i> (position)           | <i>pheT</i> (position)           | <i>pyrG</i> (position)          | <i>rplB</i> (position)             | <i>rplC</i> (position)             | <i>rpsC</i> (position)             | 16S rRNA (position)           |
|-----------------------------------------------------|----------------------------------|----------------------------------|---------------------------------|------------------------------------|------------------------------------|------------------------------------|-------------------------------|
| <i>Clostridium butyricum</i> DSM 10702 <sup>T</sup> | CP040626 (3838109-3841037)       | CP040626 (1549315-1551693)       | CP040626 (3450461-3452068)      | CP040626 (3708046-3708876)         | CP040626 (3709883-3710512)         | CP040626 (3706662-3707330)         | NR113244                      |
| <i>C. carnis</i> NCTC 10913 <sup>T</sup>            | UYIN01000001 (1153251-1156364)   | NZUYIN01000006 (c73540-71162)    | UYIN01000001 (1274954-1276567)  | UYIN01000020 (183618-184448)       | UYIN01000020 (181987-182616)       | UYIN01000020 (185167-185832)       | UYIN01000001 (c823776-822274) |
| <i>C. celatum</i> DSM 1785 <sup>T</sup>             | KB291597 (28127-31237)           | NZKB291681 (20477-22855)         | NZKB291625 (29267-30865)        | NZKB291623 (2861-3694)             | NZKB291623 (1232-1861)             | NZKB291623 (4422-5090)             | NZKB291630 (1-1430)           |
| <i>C. chauvoei</i> DSM 7528 <sup>T</sup>            | CP018624 (c2523240-2520130)      | CP018624 (979516-981894)         | CP018624 (164148-165754)        | CP018624 (c2374593-2373760)        | CP018624 (c2376226-2375597)        | CP018624 (c2373030-2372362)        | CP018624 (121222-122735)      |
| <i>C. intestinale</i> DSM 6191 <sup>T</sup>         | NZFQXU01000008 (195030-198140)   | NZFQXU01000007 (c207130-204752)  | NZFQXU01000007 (c30086-28479)   | NZFQXU01000011 (3021-3854)         | NZFQXU01000011 (1392-2021)         | NZFQXU01000011 (4581-5246)         | NZFQXU01000002 (1-1415)       |
| <i>C. isatidis</i> DSM 15098 <sup>T</sup>           | CP016786 (77419-80535)           | CP016786 (805456-807796)         | CP016786 (2585438-2587011)      | CP016786 (253228-254061)           | CP016786 (251601-252230)           | CP016786 (254786-255457)           | CP016786 (9316-10836)         |
| <i>C. perfringens</i> ATCC 13124 <sup>T</sup>       | CP000246 (3131476-3134386)       | CP000246 (c2383355-2380974)      | CP000246 (2742022-2743592)      | CP000246 (2972427-2973260)         | CP000246 (2974247-2974876)         | CP000246 (2971023-2971691)         | NR121697                      |
| <i>C. scatologenes</i> DSM 25775 <sup>T</sup>       | CP009933 (c4315282-4312178)      | CP009933 (5160306-5162649)       | CP009933 (4249831-4251414)      | CP009933 (4636370-4637197)         | CP009933 (4634742-4635371)         | CP009933 (4637918-4638589)         | CP009933 (4591775-4593274)    |
| <i>C. septicum</i> DSM 7534 <sup>T</sup>            | CP023671 (1850871-1853893)       | CP023671 (3173739-3176079)       | CP023671 (2208761-2210368)      | CP023671 (2011697-2012520)         | CP023671 (2010064-2010693)         | CP023671 (2013261-2013920)         | AB971813                      |
| <i>C. tarantellae</i> DSM 3997 <sup>T</sup>         | NZWHJC01000341 (c3249-139)       | NZWHJC01000015 (c5308-2927)      | NZWHJC01000033 (18162-19769)    | NZWHJC01000022 (3494-4327)         | NZWHJC01000022 (1869-2498)         | NZWHJC01000022 (5069-5734)         | NZWHJC01000270 (82-1591)      |
| <i>C. tertium</i> DSM 2485 <sup>T</sup>             | NZJAGGJY010000004 (c97853-94743) | NZJAGGJY010000007 (c53080-50702) | NZJAGGJY010000021 (42455-44056) | NZJAGGJY010000005 (c183396-182563) | NZJAGGJY010000005 (c185025-184396) | NZJAGGJY010000005 (c181833-181165) | Y18174                        |
| <i>Sarcina maxima</i> DSM 316 <sup>T</sup>          | <b>OK032175</b>                  | <b>OK032219</b>                  | <b>OK032245</b>                 | <b>OK032271</b>                    | <b>OK032297</b>                    | <b>OK032323</b>                    | <b>NR026147</b>               |
| <i>S. maxima</i> 5a                                 | <b>OK032177</b>                  | <b>OK032221</b>                  | <b>OK032247</b>                 | <b>OK032273</b>                    | <b>OK032299</b>                    | <b>OK032325</b>                    | <b>MZ970332</b>               |
| <i>S. maxima</i> 7                                  | <b>OK032200</b>                  | <b>OK032244</b>                  | <b>OK032270</b>                 | <b>OK032296</b>                    | <b>OK032322</b>                    | <b>OK032348</b>                    | <b>MZ970355</b>               |
| <i>S. ventriculi</i> D3-1                           | <b>OK032199</b>                  | <b>OK032243</b>                  | <b>OK032269</b>                 | <b>OK032295</b>                    | <b>OK032321</b>                    | <b>OK032347</b>                    | <b>MZ970354</b>               |

|                                                  |                               |                                 |                              |                                 |                                 |                                 |                                 |
|--------------------------------------------------|-------------------------------|---------------------------------|------------------------------|---------------------------------|---------------------------------|---------------------------------|---------------------------------|
| <i>S. ventriculi</i> DSM 286 <sup>T</sup>        | OK032176                      | OK032220                        | OK032246                     | OK032272                        | OK032298                        | OK032324                        | MZ970331                        |
| <i>S. ventriculi</i> NCTC 12966 <sup>T</sup>     | UAUL01000007 (c267254-264144) | NZUAUL01000008 (37282-39660)    | NZUAUL01000009 (19794-21398) | NZUAUL01000007 (c141122-140289) | NZUAUL01000007 (c142746-142117) | NZUAUL01000007 (c139552-138887) | NZUAUL01000001 (c554186-552677) |
| <i>S. ventriculi</i> Sa2                         | OK032195                      | OK032239                        | OK032265                     | OK032291                        | OK032317                        | OK032343                        | MZ970350                        |
| <i>S. ventriculi</i> SIAM 3/5c                   | OK032196                      | OK032240                        | OK032266                     | OK032292                        | OK032318                        | OK032344                        | MZ970351                        |
| <i>S. ventriculi</i> 14                          | NZBCMV01000019 (c60031-56921) | NZBCMV01000024 (10607-12985)    | NZBCMV01000005 (c11072-9468) | NZBCMV01000016 (2473-3306)      | NZBCMV01000016 (849-1478)       | NZBCMV01000016 (4043-4708)      | LC101491                        |
| <i>S. ventriculi</i> 17                          | NZBCMW01000010 (c60041-56931) | NZBCMW01000003 (c374642-372264) | NZBCMW01000007 (17112-18716) | NZBCMW01000017 (2483-3316)      | NZBCMW01000017 (859-1488)       | NZBCMW01000017 (4053-4718)      | LC101492                        |
| <i>S. ventriculi</i> 12/4b                       | OK032197                      | OK032241                        | OK032267                     | OK032293                        | OK032319                        | OK032345                        | MZ970352                        |
| <i>S. ventriculi</i> 13/5a                       | OK032198                      | OK032242                        | OK032268                     | OK032294                        | OK032320                        | OK032346                        | MZ970353                        |
| <i>S. ventriculi</i> 39/7a                       | OK032178                      | OK032222                        | OK032248                     | OK032274                        | OK032300                        | OK032326                        | MZ970333                        |
| <i>S. ventriculi</i> 39/7b                       | OK032179                      | OK032223                        | OK032249                     | OK032275                        | OK032301                        | OK032327                        | MZ970334                        |
| <i>S. ventriculi</i> 46/5b                       | OK032180                      | OK032224                        | OK032250                     | OK032276                        | OK032302                        | OK032328                        | MZ970335                        |
| <i>S. ventriculi</i> 47/5b                       | OK032181                      | OK032225                        | OK032251                     | OK032277                        | OK032303                        | OK032329                        | MZ970336                        |
| <i>S. ventriculi</i> 48/3                        | OK032182                      | OK032226                        | OK032252                     | OK032278                        | OK032304                        | OK032330                        | MZ970337                        |
| <i>S. ventriculi</i> 51/4a                       | OK032183                      | OK032227                        | OK032253                     | OK032279                        | OK032305                        | OK032331                        | MZ970338                        |
| <i>S. ventriculi</i> 51/4c                       | OK032184                      | OK032228                        | OK032254                     | OK032280                        | OK032306                        | OK032332                        | MZ970339                        |
| <i>S. ventriculi</i> 52/3c                       | OK032185                      | OK032229                        | OK032255                     | OK032281                        | OK032307                        | OK032333                        | MZ970340                        |
| <i>S. ventriculi</i> 60/3c                       | OK032186                      | OK032230                        | OK032256                     | OK032282                        | OK032308                        | OK032334                        | MZ970341                        |
| <i>Candidatus</i> <i>Sarcina troglodydae</i> JB2 | CP051754 (2211988-2214898)    | CP051754 (1703988-1706366)      | CP051754 (1949002-1950564)   | CP051754 (2088199-2089022)      | CP051754 (2090017-2090646)      | CP051754 (2086795-2087451)      | CP051754 (9441-10960)           |
| <i>Sarcina</i> sp. D3/3C                         | OK032187                      | OK032231                        | OK032257                     | OK032283                        | OK032309                        | OK032335                        | MZ970342                        |
| <i>Sarcina</i> sp. K1/7A                         | OK032188                      | OK032232                        | OK032258                     | OK032284                        | OK032310                        | OK032336                        | MZ970343                        |
| <i>Sarcina</i> sp. K3/7B                         | OK032189                      | OK032233                        | OK032259                     | OK032285                        | OK032311                        | OK032337                        | MZ970344                        |

|                           |          |          |          |          |          |          |          |
|---------------------------|----------|----------|----------|----------|----------|----------|----------|
| <i>Sarcina</i> sp. N13/4e | OK032190 | OK032234 | OK032260 | OK032286 | OK032312 | OK032338 | MZ970345 |
| <i>Sarcina</i> sp. S1/3c  | OK032191 | OK032235 | OK032261 | OK032287 | OK032313 | OK032339 | MZ970346 |
| <i>Sarcina</i> sp. S2/2b  | OK032192 | OK032236 | OK032262 | OK032288 | OK032314 | OK032340 | MZ970347 |
| <i>Sarcina</i> sp. S8/2c  | OK032193 | OK032237 | OK032263 | OK032289 | OK032315 | OK032341 | MZ970348 |
| <i>Sarcina</i> sp. S10/2a | OK032194 | OK032238 | OK032264 | OK032290 | OK032316 | OK032342 | MZ970349 |
