# Supplementary material for: Species and Strain Variability among Sarcina Isolates from Diverse Mammalian Hosts
Source: MDPI journal article supplement (doi:10.3390/ani13091529), 2023-05-03
Supplement: s1 [file s1]

**Table S2.** List of animal hosts cultured to detect *Sarcina*-like bacteria. Due to the large species and breed variability, there is a more detailed list of monkey and dog samples.

| ANIMAL HOST    |                               |                     |
|----------------|-------------------------------|---------------------|
| Primate sample | Primate species               | <i>Sarcina</i> spp. |
| PR1            | Common marmoset               | X                   |
| PR2            | Common marmoset               | ✓                   |
| PR3            | White-faced saki              | X                   |
| PR4            | Emperor tamarin               | X                   |
| PR5            | Moustached tamarin            | X                   |
| PR6            | Brown-mantled tamarin         | X                   |
| PR7            | Red-handed tamarin            | X                   |
| PR8            | Red-handed tamarin            | X                   |
| PR9            | Emperor tamarin               | X                   |
| PR10           | Silvery marmoset              | X                   |
| PR11           | Silvery marmoset              | X                   |
| PR15           | Silvery marmoset              | X                   |
| PR16           | Emperor tamarin               | X                   |
| PR17           | Emperor tamarin               | X                   |
| PR18           | Chimpanzee                    | X                   |
| PR19           | Northern white-cheeked gibbon | X                   |
| PR20           | Golden-bellied mangabey       | X                   |
| PR21           | Diana monkey                  | X                   |
| PR22           | Lion-tailed macaque           | X                   |
| PR23           | Hamadryas baboon              | X                   |
| PR24           | Pygmy marmoset                | X                   |
| PR26           | Cotton-top tamarin            | X                   |
| PR27           | Golden lion tamarin           | X                   |
| PR28           | Common marmoset               | X                   |
| PR29           | Patas monkey                  | ✓                   |
| PR30           | Goeldi's marmoset             | X                   |
| PR31           | White-headed marmoset         | X                   |
| PR32           | White-headed marmoset         | X                   |
| PR33           | Moustached tamarin            | X                   |
| PR34           | Patas monkey                  | X                   |
| PR35           | Silvery marmoset              | X                   |
| PR36           | Campbell's Mona monkey        | ✓                   |
| PR37           | Putty-nosed monkey            | ✓                   |
| PR38           | Northern Talapoin monkey      | ✓                   |
| PR39           | De Brazza's monkey            | ✓                   |
| PR40           | Northern white-cheeked gibbon | ✓                   |
| PR41           | Chimpanzee                    | X                   |
| PR42           | Chimpanzee                    | X                   |
| PR43           | Chimpanzee                    | X                   |
| PR44           | Chimpanzee                    | X                   |

|            |                               |   |
|------------|-------------------------------|---|
| PR45       | Patas monkey                  | ✓ |
| PR46       | Yellow-cheeked crested gibbon | ✓ |
| PR47       | Yellow-cheeked crested gibbon | ✓ |
| PR51       | Yellow-cheeked crested gibbon | ✓ |
| PR52       | Vervet monkey                 | ✓ |
| PR55       | Hamlyn's monkey               | ✓ |
| PR56       | Roloway monkey                | ✓ |
| PR57       | Lesser spot-nosed monkey      | ✓ |
| PR58       | Yellow-cheeked crested gibbon | × |
| PR59       | Northern white-cheeked gibbon | ✓ |
| PR60       | Northern white-cheeked gibbon | ✓ |
| PR61       | Golden lion tamarin           | × |
| PR12       | Ring-tailed lemur             | ✓ |
| PR13       | Ring-tailed lemur             | ✓ |
| PR14       | Ring-tailed lemur             | ✓ |
| PR48       | Ring-tailed lemur             | ✓ |
| SIAM1-PR62 | Gibbon siamang                | ✓ |
| SIAM2-PR63 | Gibbon siamang                | ✓ |
| SIAM3-PR64 | Gibbon siamang                | ✓ |
| GLT-A      | Golden lion tamarin           | × |
| GLT-B      | Golden lion tamarin           | × |
| GLT-C      | Golden lion tamarin           | × |
| GLT-D      | Golden lion tamarin           | ✓ |
| GLT-E      | Golden lion tamarin           | × |
| GLT-F      | Golden lion tamarin           | × |

| Dog sample | Dog breed               | Sarcina spp. |
|------------|-------------------------|--------------|
| VB1        | German shepherd dog     | ×            |
| VB2        | German shepherd dog     | ×            |
| VB3        | German shepherd dog     | ×            |
| VB4        | Golden retriever        | ×            |
| VB5        | Samoyed                 | ×            |
| VB6        | German shepherd dog     | ×            |
| VB7        | German shepherd dog     | ×            |
| VB8        | German shepherd dog     | ×            |
| VB9        | German shepherd dog     | ×            |
| VB10       | Czechoslovakian wolfdog | ×            |
| VB11       | Crossbreed dog          | ×            |
| VB12       | German shepherd dog     | ×            |
| VB13       | Swiss shepherd          | ×            |
| VB14       | German shepherd dog     | ×            |
| VB15       | Labrador retriever      | ×            |
| VB16       | Foxterier               | ×            |
| VB17       | Belgian shepherd        | ×            |
| VB18       | Czechoslovakian wolfdog | ×            |
| VB19       | Swiss shepherd          | ×            |
| VB20       | Crossbreed dog          | ×            |

|       |                                |   |
|-------|--------------------------------|---|
| VB21  | Crossbreed dog                 | X |
| VB22  | German shepherd dog            | X |
| VB23  | German shepherd dog            | X |
| VB24  | Belgian shepherd               | X |
| VB25  | Havanese                       | X |
| VB26  | Havanese                       | X |
| VB27  | Havanese                       | X |
| VB28  | Crossbreed dog                 | X |
| VB29  | Crossbreed dog                 | X |
| VB30  | Crossbreed dog                 | X |
| VB31  | Crossbreed dog                 | X |
| VB32  | Golden retriever               | X |
| VB33  | German shepherd dog            | X |
| VB34  | German shepherd dog            | X |
| VB35  | German shepherd dog            | X |
| VB36  | German shepherd dog            | X |
| VB37  | German shepherd dog            | X |
| VB38  | German shepherd dog            | X |
| VB39  | German shepherd dog            | X |
| VB40  | German shepherd dog            | X |
| VB41  | German shepherd dog            | X |
| VB42  | German shepherd dog            | X |
| VB43  | German shepherd dog            | X |
| VB44  | German shepherd dog            | X |
| VB45  | German shepherd dog            | X |
| VB46  | German shepherd dog            | X |
| VB47  | German shepherd dog            | X |
| VB48  | German shepherd dog            | X |
| VB49  | German shepherd dog            | X |
| <hr/> |                                |   |
| KK1   | Border collie                  | X |
| KK2   | Border collie                  | X |
| KK3   | Border collie                  | X |
| KK4   | Border collie                  | X |
| KK5   | Border collie                  | X |
| KK6   | Border collie                  | X |
| KK7   | Border collie                  | X |
| KK8   | Cavalier king Charles spaniel  | X |
| KK9   | Border collie                  | X |
| KK10  | Border collie                  | X |
| KK11  | Not known                      | X |
| KK12  | Border collie                  | X |
| KK13  | American staffordshire terrier | ✓ |
| KK14  | Crossbreed dog                 | X |
| KK15  | Crossbreed dog                 | X |
| KK16  | Crossbreed dog                 | X |
| KK17  | Whippet                        | X |

|                          |                          |                     |
|--------------------------|--------------------------|---------------------|
| KK18                     | Basenji                  | X                   |
| KK19                     | Crossbreed dog           | X                   |
| KK20                     | Crossbreed dog           | X                   |
| KK21                     | Border collie            | X                   |
| <b>Elephant sample</b>   | <b>Species</b>           | <b>Sarcina spp.</b> |
| S1-8 ( <i>n</i> =8)      | Asian elephant           | ✓                   |
| K, D ( <i>n</i> =2)      | Asian elephant           | ✓                   |
| <b>Rhinoceros sample</b> | <b>Species</b>           | <b>Sarcina spp.</b> |
| RH1-2 ( <i>n</i> =2)     | Eastern black rhinoceros | ✓                   |
| <b>Calf sample</b>       | <b>Breed</b>             | <b>Sarcina spp.</b> |
| CA ( <i>n</i> =48)       | Holstein-Friesian calf   | X                   |
| CA ( <i>n</i> =2)        | Holstein-Friesian calf   | ✓                   |

Footnotes: ✓ - detected, X- not detected, PR1-48 – primate samples [17], other PR & GLT (unpublished data), VB – dog samples [23], KK – dog samples (unpublished data), S – elephant samples (unpublished data, Zoo Liberec), K, D – elephant samples (unpublished, Zoo Ústí nad Labem), RH – rhinoceros sample (unpublished, Safari park Dvůr Králové), CA – calf samples (unpublished, farm Vražkov).
