# Supplementary figures and images for: Species and Strain Variability among Sarcina Isolates from Diverse Mammalian Hosts
Source: MDPI journal article supplement (doi:10.3390/ani13091529), 2023-05-03

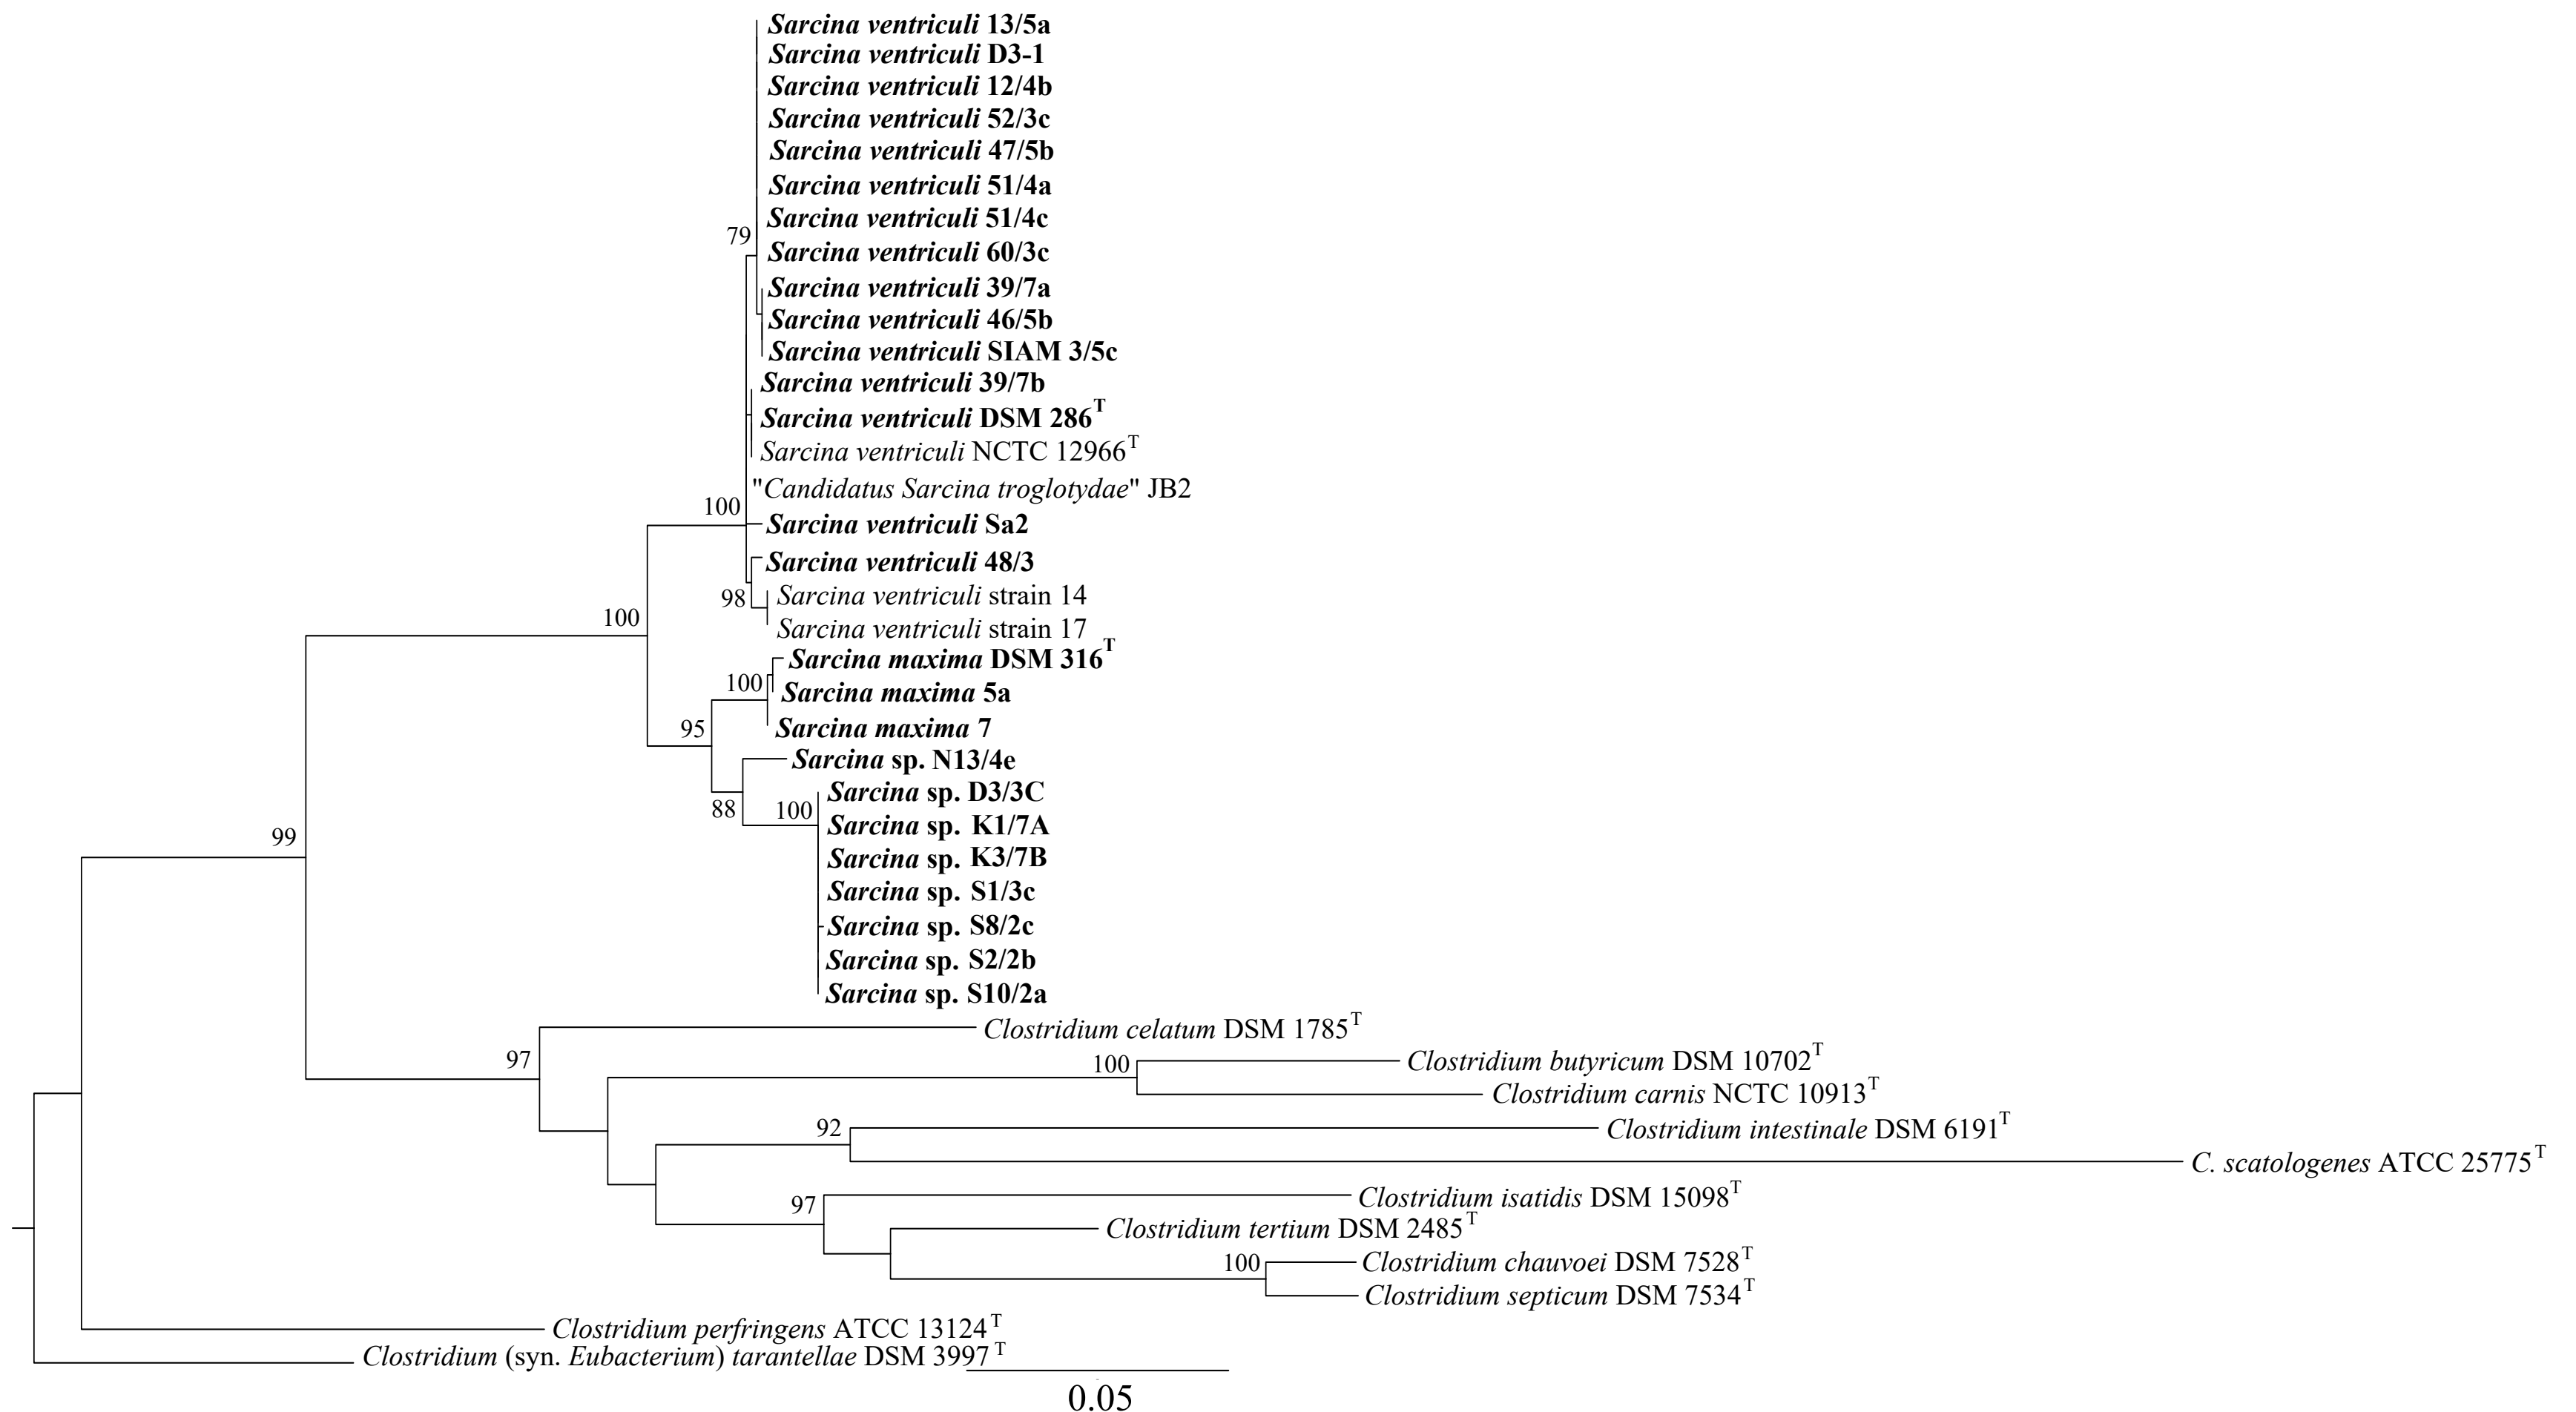

Supplement: s1 [file s1]
